## 15 **Abstract**

16           Herein, we report a novel *Carnobacterium*-like organism, CS13<sup>T</sup>, isolated from the blood  
17 of sheep with persistent diarrhea from a grassland pasturing area in Xilingol League, Inner  
18 Mongolia Municipality, China. Homology analysis indicated that CS13<sup>T</sup> belongs to the genus  
19 *Carnobacterium* and is 100% related to the reported environmental microorganism  
20 *Carnobacterium antarticum* sp. *CPI* (*C. CPI*), which was isolated from sandy soil near Davis  
21 Station, Antarctica; the following strains are closely related: *Carnobacterium mobile* DSM 4848  
22 (97%) and *Carnobacterium funditum* DSM 5970 (96%). Similar to those of the *C. CPI*, the short  
23 rod-shaped cells of CS13<sup>T</sup> are 0.4-0.8 µm wide and 1.0-1.5 µm long; exist singly, paired or  
24 catenoid; are gram positive, non-spore forming, and facultatively anaerobic; and produce  
25 hemolysin. CS13<sup>T</sup> cannot produce gas or H<sub>2</sub>S but can ferment sucrose, galactose, salicin, and  
26 esculin to produce acid. However, in contrast to *C. CPI*, CS13<sup>T</sup> can produce acid from cellobiose  
27 and maltose and is weakly positive for D-mannose fermentation; the growth temperatures range  
28 from 20-37°C, the pH range is 5.0-9.0, and the G+C content is 37.84% (4-36°C, pH 6.0-9.5, and  
29 38.1% for *C. CPI*). Furthermore, based on gene annotation analysis, we found that CS13T has  
30 31 more specific genes than *C. CPI* (133 to 102) and that the nonredundant protein similarity to  
31 *C. CPI* is only 84.2%. Based on the physiological-biochemical and genetic analysis results, we  
32 infer that the organisms isolated from the Mongolian Plateau and sandy soil in Antarctica belong  
33 to the same novel species of the genus *Carnobacterium*; therefore, this novel species probably  
34 has distributed globally and should not be called *species antarticum*.

## 36 **Introduction**

37 Carnobacteria are ubiquitous lactic acid bacteria (LAB), tolerant to freezing/thawing and  
38 high pressure and able to grow at low temperatures [1]. The genus belongs to the *family*  
39 *Carnobacteriaceae* of the *phylum Firmicutes*, *class Bacilli*, *order Lactobacillales*, as described  
40 in *Bergey's Manual of Systematic Bacteriology* [2], and includes motile, psychrotolerant, short  
41 rod-shaped, gram-positive, facultatively anaerobic, heterofermentative lactic acid bacteria that  
42 can produce L-lactic acid from mostly fermented D-glucose [3]. At the time of writing, 12  
43 recognized species had been correctly named and collected in the List of Prokaryotic names with  
44 Standing in Nomenclature (LPSN) collection (<http://www.bacterio.net>).

45 The species *C. divergens*, *C. gallinarum* and *C. mobile* are frequently encountered in the  
46 environment and in foods. *C. antarcticum*, *C. alterfunditum*, *C. funditum* and *C. iners* were  
47 isolated from sandy soil, anoxic lake water and the littoral zone of Antarctica [2,4,5]. *C. inhibens*  
48 and *C. maltaromaticum* were found in Atlantic salmon and infected Lake Whitefish, respectively  
49 [6,7]. Additionally, *C. pleistocenium* was isolated from permafrost of the Fox Tunnel in Alaska  
50 [8], *C. viridians* was isolated from vacuum-packed bologna sausage [9], and *C. jeotgali* was  
51 isolated from a Korean traditional fermented food [10]. Although a large number of research  
52 studies have reported isolation of these bacteria from various regions and environments, many  
53 species have not yet been allocated to known species, such as the *Carnobacterium*-like  
54 organisms isolated from the larval midgut of a moth species [11], spent mushroom compost [12]  
55 and watershed polluted with horse manure [13].

56           In this study, we isolated a novel *Carnobacterium*-like organism, designated CS13<sup>T</sup>, from  
57 the blood of sheep with persistent diarrhea in the Mongolian Plateau in China. To further clarify  
58 the diversity of this novel isolated strain and *Carnobacterium antarticum* sp. *CPI*, this paper  
59 discussed the similarities and differences through culture characteristics, phenotypic  
60 characterization, and physiological-biochemical and phylogenetic characteristics.

61

## 62 **Materials and methods**

63

### 64 **Ethics statement**

65           This study was approved by the Animal Ethics Committee of Chongqing Academy of  
66 Animal Sciences. The protocol of blood sample collection was established according to A Good  
67 Practice Guide to the Administration of Substances and Removal of Blood, Including Routes and  
68 Volumes [14].

69

### 70 **Collection of blood samples and isolation of strains**

71           Grazing sheep with persistent diarrhea were found at Zhenglan Banner, Xilinguole  
72 League, Inner Mongolia Municipality, China (N42°42'09", E116°13'19"), in 2019. Cervical vein  
73 blood samples of sheep were collected by a sterile syringe, and the samples were stored in  
74 anticoagulative tubes at 4°C. To culture and separate the pathogens from blood samples, brain  
75 heart infusion broth liquid (BHI) medium and Columbia blood agar (CBA, supplemented with

76 5% (v/v) defibrinated sheep blood) medium were prepared as previously described [15]. Aliquots  
77 of 100  $\mu$ L of the blood samples were streak-inoculated on CBA medium at 4°C, 20°C, 25°C, 30°C  
78 or 37°C in the presence or absence of oxygen. Colonies were observed after 72 h, and the clearest  
79 colonies were subcultured into BHI medium and then cultured for 48 h. Recovered pure cultures  
80 were preserved at -80°C in BHI broth supplemented with 20% glycerol.

81

## 82 **Physiology and biochemistry observation**

83 To define the optimal culture conditions, the isolated strain was inoculated in BHI  
84 medium with extra NaCl concentrations of 1.0-10.0% (at intervals of 1.0%, w/v) at pH 5.0-10.0  
85 (at intervals of 1.0) at growth temperature for 72 h separately. CBA was used as a growth and  
86 hemolysin examination medium to culture the isolated strain. Gram staining was conducted with  
87 a gram staining kit (Solarbio) and observed by optical microscopy (Nikon). The morphology,  
88 size and flagellum ultrastructure of the isolated strain were observed by a JEOL JEM-1200EX  
89 electron microscope after uranyl acetate and citromalic acid lead double staining. The  
90 biochemical properties, including glycolysis reaction, indole production, hydrogen sulfide  
91 production, methyl red test, pyruvate utilization, nitrate reduction and acid production, were  
92 determined using a Micro-Biochemical Identification Tube (Hopebio).

93

## 94 **Homology and phylogenetic analyses**

95           The genomic DNA of the isolated strain was extracted using a Bacterial DNA Kit  
96 (TIANGEN) and then submitted to Sangon Biotech (Shanghai) for sequencing. Homologous  
97 sequences were compared with NT (NCBI nucleotide sequences database), NR (NCBI  
98 nonredundant protein sequences database) and Swiss-Prot (manually annotated and reviewed  
99 protein sequences database). Phylogenetic analysis was performed via maximum-likelihood,  
100 maximum-parsimony and neighbor-joining algorithms in MEGA version 7.0 [16]. Additionally,  
101 comparisons of the core genes, dispensable genes and specific genes were also used in  
102 phylogenetic analyses.

103

## 104 **Results**

105

### 106 **Isolation and identification**

107           Earlier isolates on CBA medium incubated with oxygen at 20-37°C (optimum, 30°C) for  
108 72 h presented bacterial colonies 1-2 mm in diameter that were white-gray and opaque, with neat  
109 edges; had a smooth convex elevation and were surrounded by a tiny hemolysis halo.  
110 Furthermore, the growth of bacteria was observed at pH 5.0-9.0 (optimum pH=8.0) and in the  
111 presence of 0-5% (w/v) NaCl (optimum, 1%) when the isolated strain was inoculated in BHI  
112 media with different pH and salinity values. Electron microscopy demonstrated that the cells of  
113 the isolated strain were slightly curved short rods approximately 0.4-0.8 µm wide and 1.0-1.5 µm  
114 long, with flagella occurring singly or in pairs or short chains (Fig 1).

115

## 116 **Physiology and biochemistry**

117       The isolate CS13<sup>T</sup> has biochemical and physiological characteristics similar to those of  
118 the Antarctica-isolated strains *Carnobacterium antarticum* sp. *CP1* and *Carnobacterium*  
119 *funditum* DSM 5970 and the frozen meat-isolated strain *Carnobacterium mobile* DSM 4848. The  
120 four strains exhibit short rod shapes, positive Gram staining, motility, facultatively anaerobic  
121 growth, growth at low temperatures, negative oxidase and catalase activities, and no H<sub>2</sub>S  
122 production. In contrast, *C. DSM 4848* is the only strain that produces gas, and except *C. DSM*  
123 *5790*, all of them utilized esculin, D-glucose, D-mannose, N-acetyl-glucosamine, salicin and  
124 sucrose to produce acid. The physiological similarity between the isolates and their closest  
125 relatives among the genus are presented in Table 1.

126

127

## 128 **Homology analysis**

129       The 16S rRNA gene of CS13<sup>T</sup> was sequenced by Sangon Biotech (Shanghai). 16S rRNA  
130 sequence alignment (NCBI blastn) showed that CS13<sup>T</sup> shares 100% identity with  
131 *Carnobacterium antarticum* sp. *CP1*, 97% with *Carnobacterium mobile* DSM 4848 and 96%  
132 with *Carnobacterium funditum* DSM 5970. The 16S rRNA gene and pangenome phylogenetic  
133 trees (Fig 2A and B) also demonstrated that CS13<sup>T</sup> and CP1 have the closest relationship.

134 Therefore, we infer that the organism isolated from the blood of sheep on the Mongolian Plateau  
135 belongs to the genus *Carnobacterium* and that CS13<sup>T</sup> is on the same branch as *C. CPI*.

136 In contrast, the NR species distribution results indicated that CS13<sup>T</sup> had only 84.2% of  
137 protein coding genes that matched those of *C. CPI* (Fig 2C). Orthologous cluster analysis  
138 revealed that CS13<sup>T</sup> has 133 specific genes, in comparison with *C. CPI* (102 specific genes) and  
139 other related species (Fig 3A and B), indicating that strain CS13<sup>T</sup> could be classified as a novel  
140 species of the genus *Carnobacterium*.

141 The protein sequence alignment of CS13<sup>T</sup> and *C. CPI* was carried out by the Circos  
142 package (Fig 4). The results illustrated that although the protein sequences of CS13<sup>T</sup> and *C. CPI*  
143 are also highly homologous, there are many specific fragments of CS13<sup>T</sup>, such as NODE\_88,  
144 NODE\_101, NODE\_113, NODE\_115 and NODE\_145, which further confirms CS13<sup>T</sup> as a novel  
145 species.

146

## 147 **Discussion**

148 *Carnobacterium* is found mostly in the intestines of animals. As intestinal probiotics,  
149 certain *Carnobacterium* can also effectively inhibit pathogens and spoilage microorganisms, so  
150 they are widely used as a food additive. Among 12 species of *Carnobacterium*, *C. divergens* and  
151 *C. maltaromaticum* are frequently isolated from food, particularly in vacuum-packaged (VP)  
152 meat and meat products, which also show the ability to inhibit pathogenic and spoilage  
153 microorganisms in diverse food matrices. Other scholars reported that *C. maltaromaticum* B26



154 and *C. divergens* B33, isolated from the intestine of healthy rainbow trout, are beneficial for  
155 enhancing cellular and humoral immune responses, and they were selected as potential probiotics  
156 with effectiveness. In this study, we first isolated a *Carnobacterium antarticum* sp. *CPI-like*  
157 organism, CS13<sup>T</sup>, from the blood of sheep with persistent diarrhea in the Mongolian Plateau in  
158 China. The results of the physiological-biochemical and genetic analyses indicate that the  
159 organisms isolated from the Mongolian Plateau and Antarctica belong to the same novel species  
160 of the genus *Carnobacterium*. However, preliminary results prove that this novel species should  
161 not be called *species antarticum* and suggest that this species is probably distributed globally and  
162 adapts to varying areas and surroundings. Whether this novel species has bacteriostatic effects or  
163 can be used in the food industry or other fields remain to be further studied.

164

165

## 166 **References**

- 167 1. Leisner JJ, Laursen BG, Prévost H, Drider D, Dalgaard P. Carnobacterium: positive  
168 and negative effects in the environment and in foods. FEMS Microbiol Rev. 2007;31:  
169 592-613.
- 170 2. Zhu S, Lin D, Xiong S, Wang X, Xue Z, Dong B, et al. Carnobacterium antarcticum  
171 sp. nov., a psychrotolerant, alkaliphilic bacterium isolated from sandy soil in  
172 Antarctica. Int J Syst Evol Microbiol. 2018;68: 1672-1677.
- 173 3. Nicholson WL, Zhalnina K, de Oliveira RR, Triplett EW. Proposal to rename  
174 *Carnobacterium inhibens* as *Carnobacterium inhibens* subsp. *inhibens* subsp. nov.  
175 and description of *Carnobacterium inhibens* subsp. *gilichinskyi* subsp. nov., a  
176 psychrotolerant bacterium isolated from Siberian permafrost. Int J Syst Evol  
177 Microbiol. 2015;65: 556-561.
- 178 4. Franzmann PD, Hpfel P, Weiss N, Tindall BJ. Psychrotrophic, lactic acid-producing  
179 bacteria from anoxic waters in Ace Lake, Antarctica; *Carnobacterium funditum* sp.  
180 nov. and *Carnobacterium alterfunditum* sp. nov. Arch Microbiol. 1991;156: 255-262.
- 181 5. Snauwaert I, Hoste B, De Bruyne K, Peeters K, De Vuyst L, Willems A, et al.  
182 *Carnobacterium iners* sp. nov., a psychrophilic, lactic acid-producing bacterium from  
183 the littoral zone of an Antarctic pond. Int J Syst Evol Microbiol. 2013;63: 1370-1375.

- 184 6. Cantas L, Fraser TWK, Fjellidal PG, Mayer I, Sørum H. The culturable intestinal  
185 microbiota of triploid and diploid juvenile Atlantic salmon (*Salmo salar*) - a  
186 comparison of composition and drug resistance. *BMC Vet Res.* 2011;7: 71.
- 187 7. Loch TP, Xu W, Fitzgerald SM, Faisal M. Isolation of a *Carnobacterium*  
188 *maltaromaticum*-like bacterium from systemically infected lake whitefish (*Coregonus*  
189 *clupeaformis*). *FEMS Microbiol Lett.* 2008;288: 76-84.
- 190 8. Pikuta EV, Marsic D, Bej A, Tang J, Krader P, Hoover RB. *Carnobacterium*  
191 *pleistocenium* sp. nov., a novel psychrotolerant, facultative anaerobe isolated from  
192 permafrost of the Fox Tunnel in Alaska. *Int J Syst Evol Microbiol.* 2005;55: 473-478.
- 193 9. Holley RA. *Carnobacterium viridans* sp. nov., an alkaliphilic, facultative anaerobe  
194 isolated from refrigerated, vacuum-packed bologna sausage. *Int J Syst Evol*  
195 *Microbiol.* 2002;52: 1881-1885.
- 196 10. Kim MS, Roh SW, Nam YD, Yoon JH, Bae JW. *Carnobacterium jeotgali* sp. nov.,  
197 isolated from a Korean traditional fermented food. *Int J Syst Evol Microbiol.*  
198 2009;59: 3168-3171.
- 199 11. Shannon AL, Attwood G, Hopcroft DH, Christeller JT. Characterization of lactic acid  
200 bacteria in the larval midgut of the keratinophagous lepidopteran, *Hofmannophila*  
201 *pseudospretella*. *Lett Appl Microbiol.* 2001;32: 36-41.
- 202 12. Ntougias S, Zervakis GI, Kavroulakis N, Ehaliotis C, Ehaliotis C, Papadopoulou KK.  
203 Bacterial diversity in spent mushroom compost assessed by amplified rDNA

- 204 restriction analysis and sequencing of cultivated isolates. *Syst Appl Microbiol.*  
205 2004;27: 746-754.
- 206 13. Simpson JM, Santo Domingo JW, Reasoner DJ. Assessment of equine fecal  
207 contamination: the search for alternative bacterial source-tracking targets. *FEMS*  
208 *Microbiol Ecol.* 2004;47: 65-75.
- 209 14. Diehl KH, Hull R, Morton D, Pfister R, Rabemampianina Y, Smith D, et al. A good  
210 practice guide to the administration of substances and removal of blood, including  
211 routes and volumes. *J Appl Toxicol.* 2001;21: 15-23.
- 212 15. Zhu S, Wang X, Zhang D, Jing X, Zhang N, Yang J, et al. Complete genome  
213 sequence of hemolysin-containing *Carnobacterium* sp. strain CP1 isolated from the  
214 Antarctic. *Genome Announc.* 2016;4: e00690-16.
- 215 16. Collins MD, Farrow JAE, Phillips BA, Feresu S, Jones D. Classification of  
216 *Lactobacillus divergens*, *Lactobacillus piscicola*, and some catalase-negative,  
217 asporogenous, rod-shaped bacteria from poultry in a new genus, *Carnobacterium*. *Int*  
218 *J Syst Evol Microbiol.* 2008;58: 2672-2672.

219

220 **Fig 1. Electron Microscope Observation.** Negative stain electron microscopy of single (A) and  
221 pairs (B) of isolated strains.

222 **Table 1. Differential Physiological Characteristics Distinguishing Strain CS13<sup>T</sup> from the**

223 **Closest Members of the Genus *Carnobacterium*.** +, -, W and ND Represent Positive, Negative,

224 Weakly Positive and 'No Data', Respectively.

225 **Fig 2. Homology Analysis.** Evolutionary relationships based on the 16S rRNA Gene (A) and

226 pangenome (B) of strain CS13<sup>T</sup> and related species. (C) The nonredundant protein gene

227 annotation of strain CS13<sup>T</sup>.

228 **Fig 3. Pan Genomic Analysis.** (A). Quantity of core genes (center) and specific genes (petal) of

229 strain CS13<sup>T</sup> and related species. (B). Gene clusters of strain CS13<sup>T</sup> and related species.

230 **Fig 4. Circos Package.** The protein sequence alignment of CS13<sup>T</sup> and *C. CPI*.

231

232

**Table 1. Differential Physiological Characteristics Distinguishing Strain CS13<sup>T</sup> from the Closest Members of the Genus *Carnobacterium* +, -, W and ND Represent Positive, Negative, Weakly Positive and ‘No Data’, Respectively.**

| Characteristic                     | CS13 <sup>T</sup>                | <i>C. CPI</i> *          | <i>C. DSM 4848</i> <sup>T†</sup> | <i>C. DSM 5970</i> <sup>T‡</sup> |
|------------------------------------|----------------------------------|--------------------------|----------------------------------|----------------------------------|
| Isolation source                   | Sheep blood in Mongolian Plateau | Sandy soil in Antarctica | Frozen chicken meat              | Lake water in Antarctica         |
| Rods                               | +                                | +                        | +                                | +                                |
| Growth temperatures (°C) (optimum) | 20-37 (30)                       | 4-36 (28-32)             | 0-35                             | 4-20 (4)                         |
| pH range (optimum)                 | 5.0-9.0 (8.0)                    | 6.0-9.5 (8.0-8.5)        | ND                               | ND                               |
| NaCl tolerance range (w/v)         | 0-5.0 (1.0)                      | 0-5.0 (1.0)              | ND                               | 1-2                              |
| Facultatively anaerobic            | +                                | +                        | +                                | +                                |
| Hemolysis                          | +                                | +                        | ND                               | ND                               |
| Gram staining                      | +                                | +                        | +                                | +                                |
| Motility                           | +                                | +                        | +                                | +                                |
| Catalase                           | -                                | -                        | ND                               | -                                |
| Oxidase                            | -                                | -                        | ND                               | ND                               |
| Produce gas                        | -                                | -                        | +                                | ND                               |
| Produce H <sub>2</sub> S           | -                                | -                        | -                                | ND                               |
| Acid from:                         |                                  |                          |                                  |                                  |
| Cellobiose                         | +                                | -                        | +                                | -                                |
| D-Glucose                          | +                                | +                        | +                                | -                                |
| D-Mannose                          | W                                | +                        | +                                | -                                |
| Maltose                            | +                                | -                        | +                                | -                                |
| N-acetyl-glucosamine               | +                                | +                        | +                                | -                                |
| Sucrose                            | +                                | +                        | +                                | -                                |
| Salicin                            | W                                | W                        | +                                | -                                |
| D-galactose                        | +                                | -                        | +                                | -                                |
| Arabitol                           | -                                | -                        | -                                | -                                |
| Glycogen                           | -                                | -                        | -                                | -                                |
| Starch                             | -                                | -                        | ND                               | -                                |
| Xylitol                            | -                                | -                        | -                                | -                                |
| Glycerol                           | W                                | W                        | ND                               | -                                |
| Esculin                            | W                                | W                        | ND                               | +                                |
| DNA G+C content (%)                | 37.84                            | 38.1                     | 35.5-37.2                        | 34                               |

\* Data for *C. antarcticum* were taken from Zhu et al. [2].

† Data for *C. mobile* were taken from Collins et al. [15].

‡ Data for *C. iners* were taken from Snauwaert et al. [5].

**A**

bioRxiv preprint doi: <https://doi.org/10.1101/2020.07.08.188136>; this version posted July 8, 2020. The copyright holder for this preprint (which was not certified by peer review) is the author/funder, who has granted bioRxiv a license to display the preprint in perpetuity. It is made available under aCC-BY-NC-ND 4.0 International license.

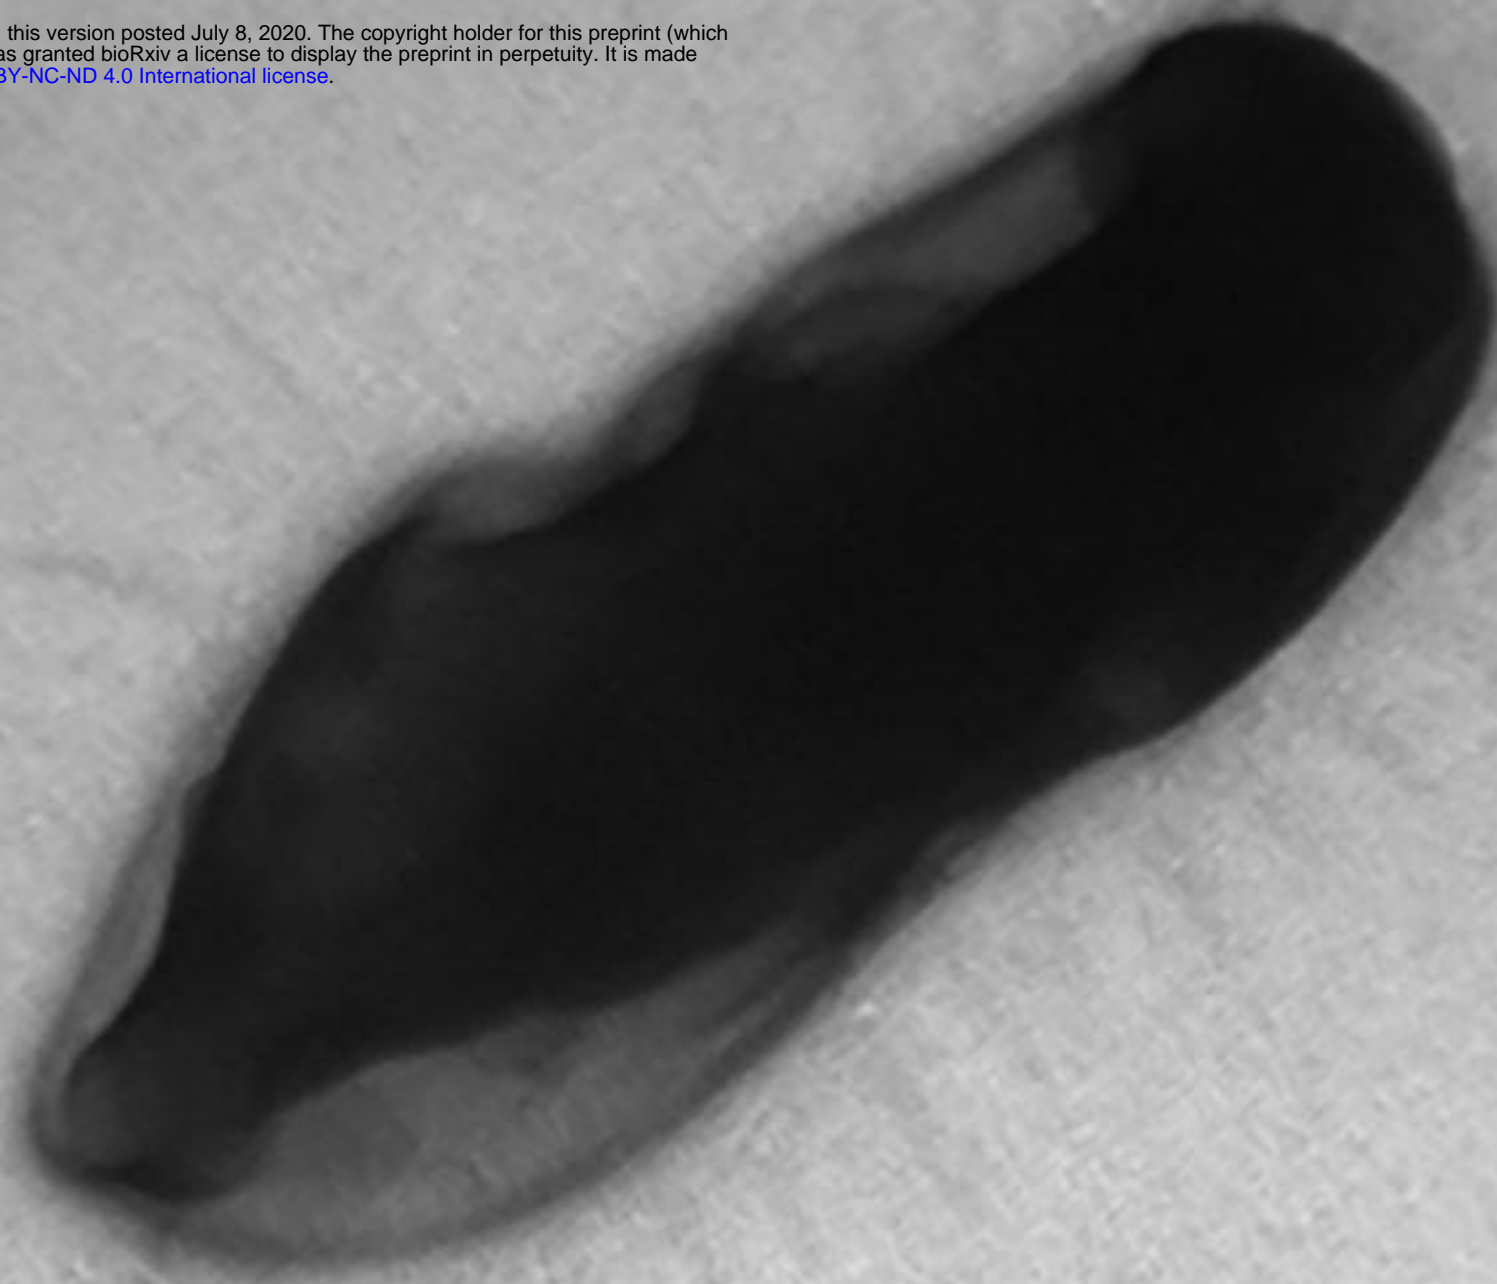

500 nm

**B**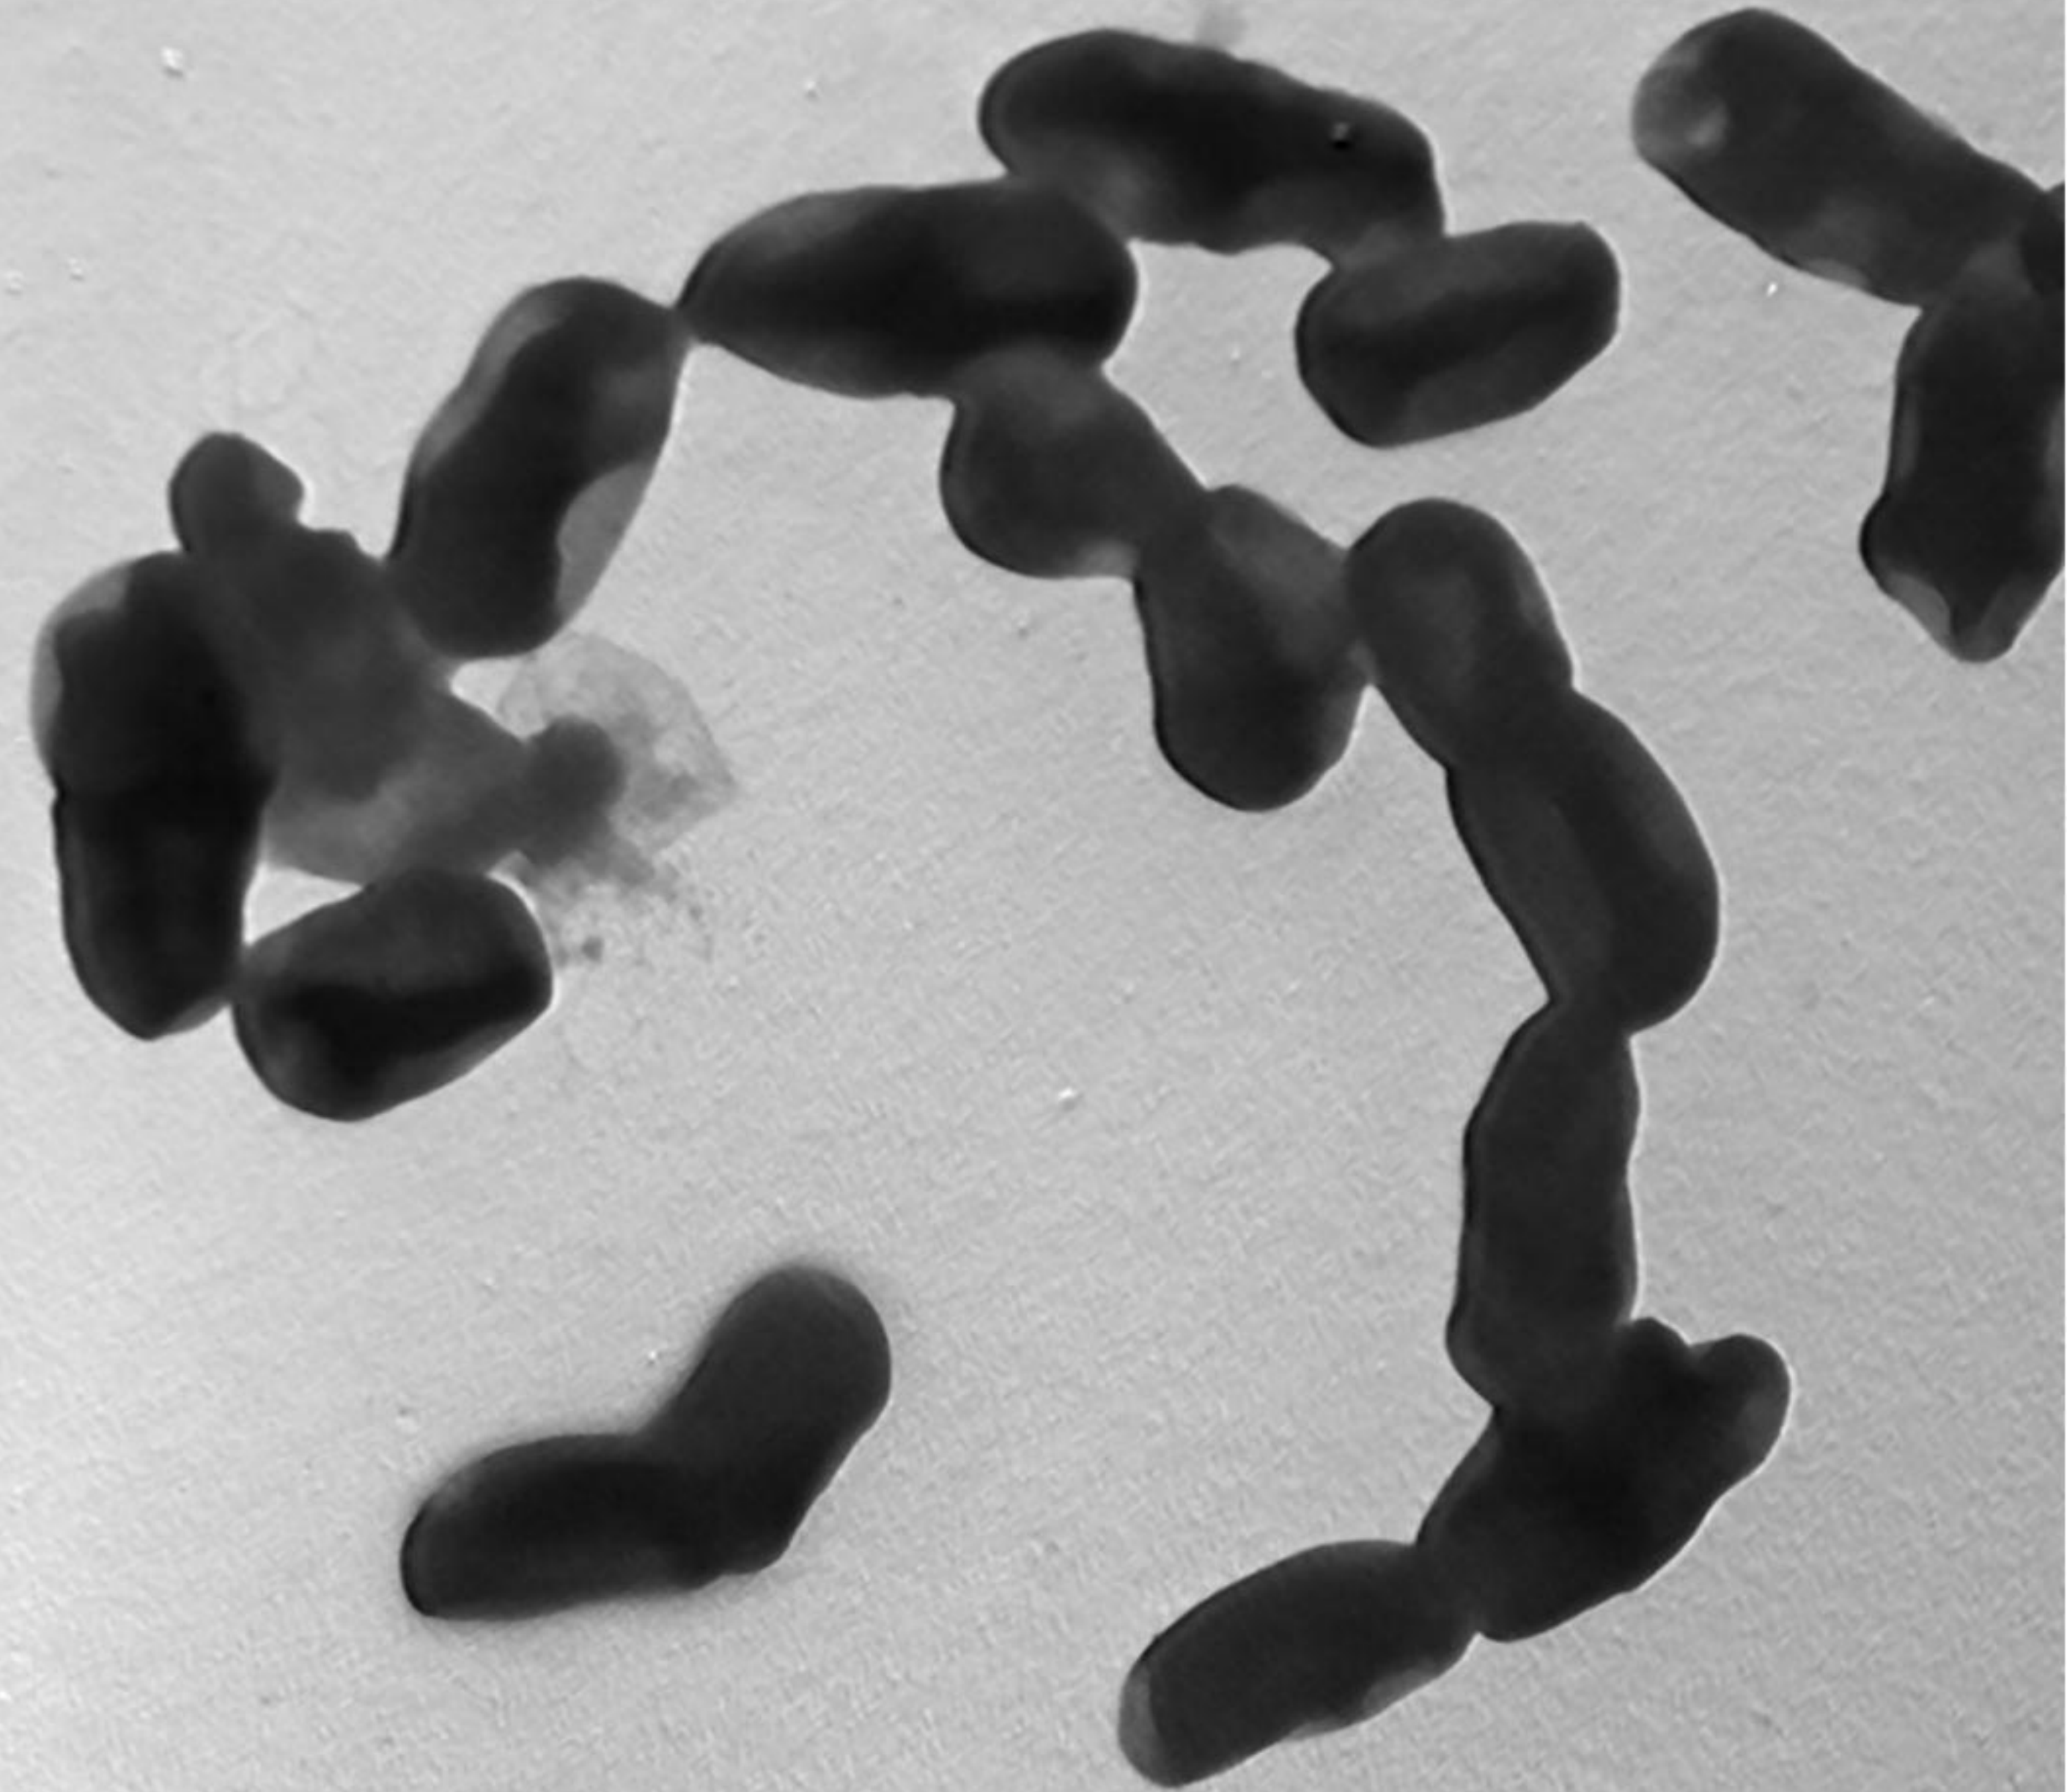

500 nm

**A**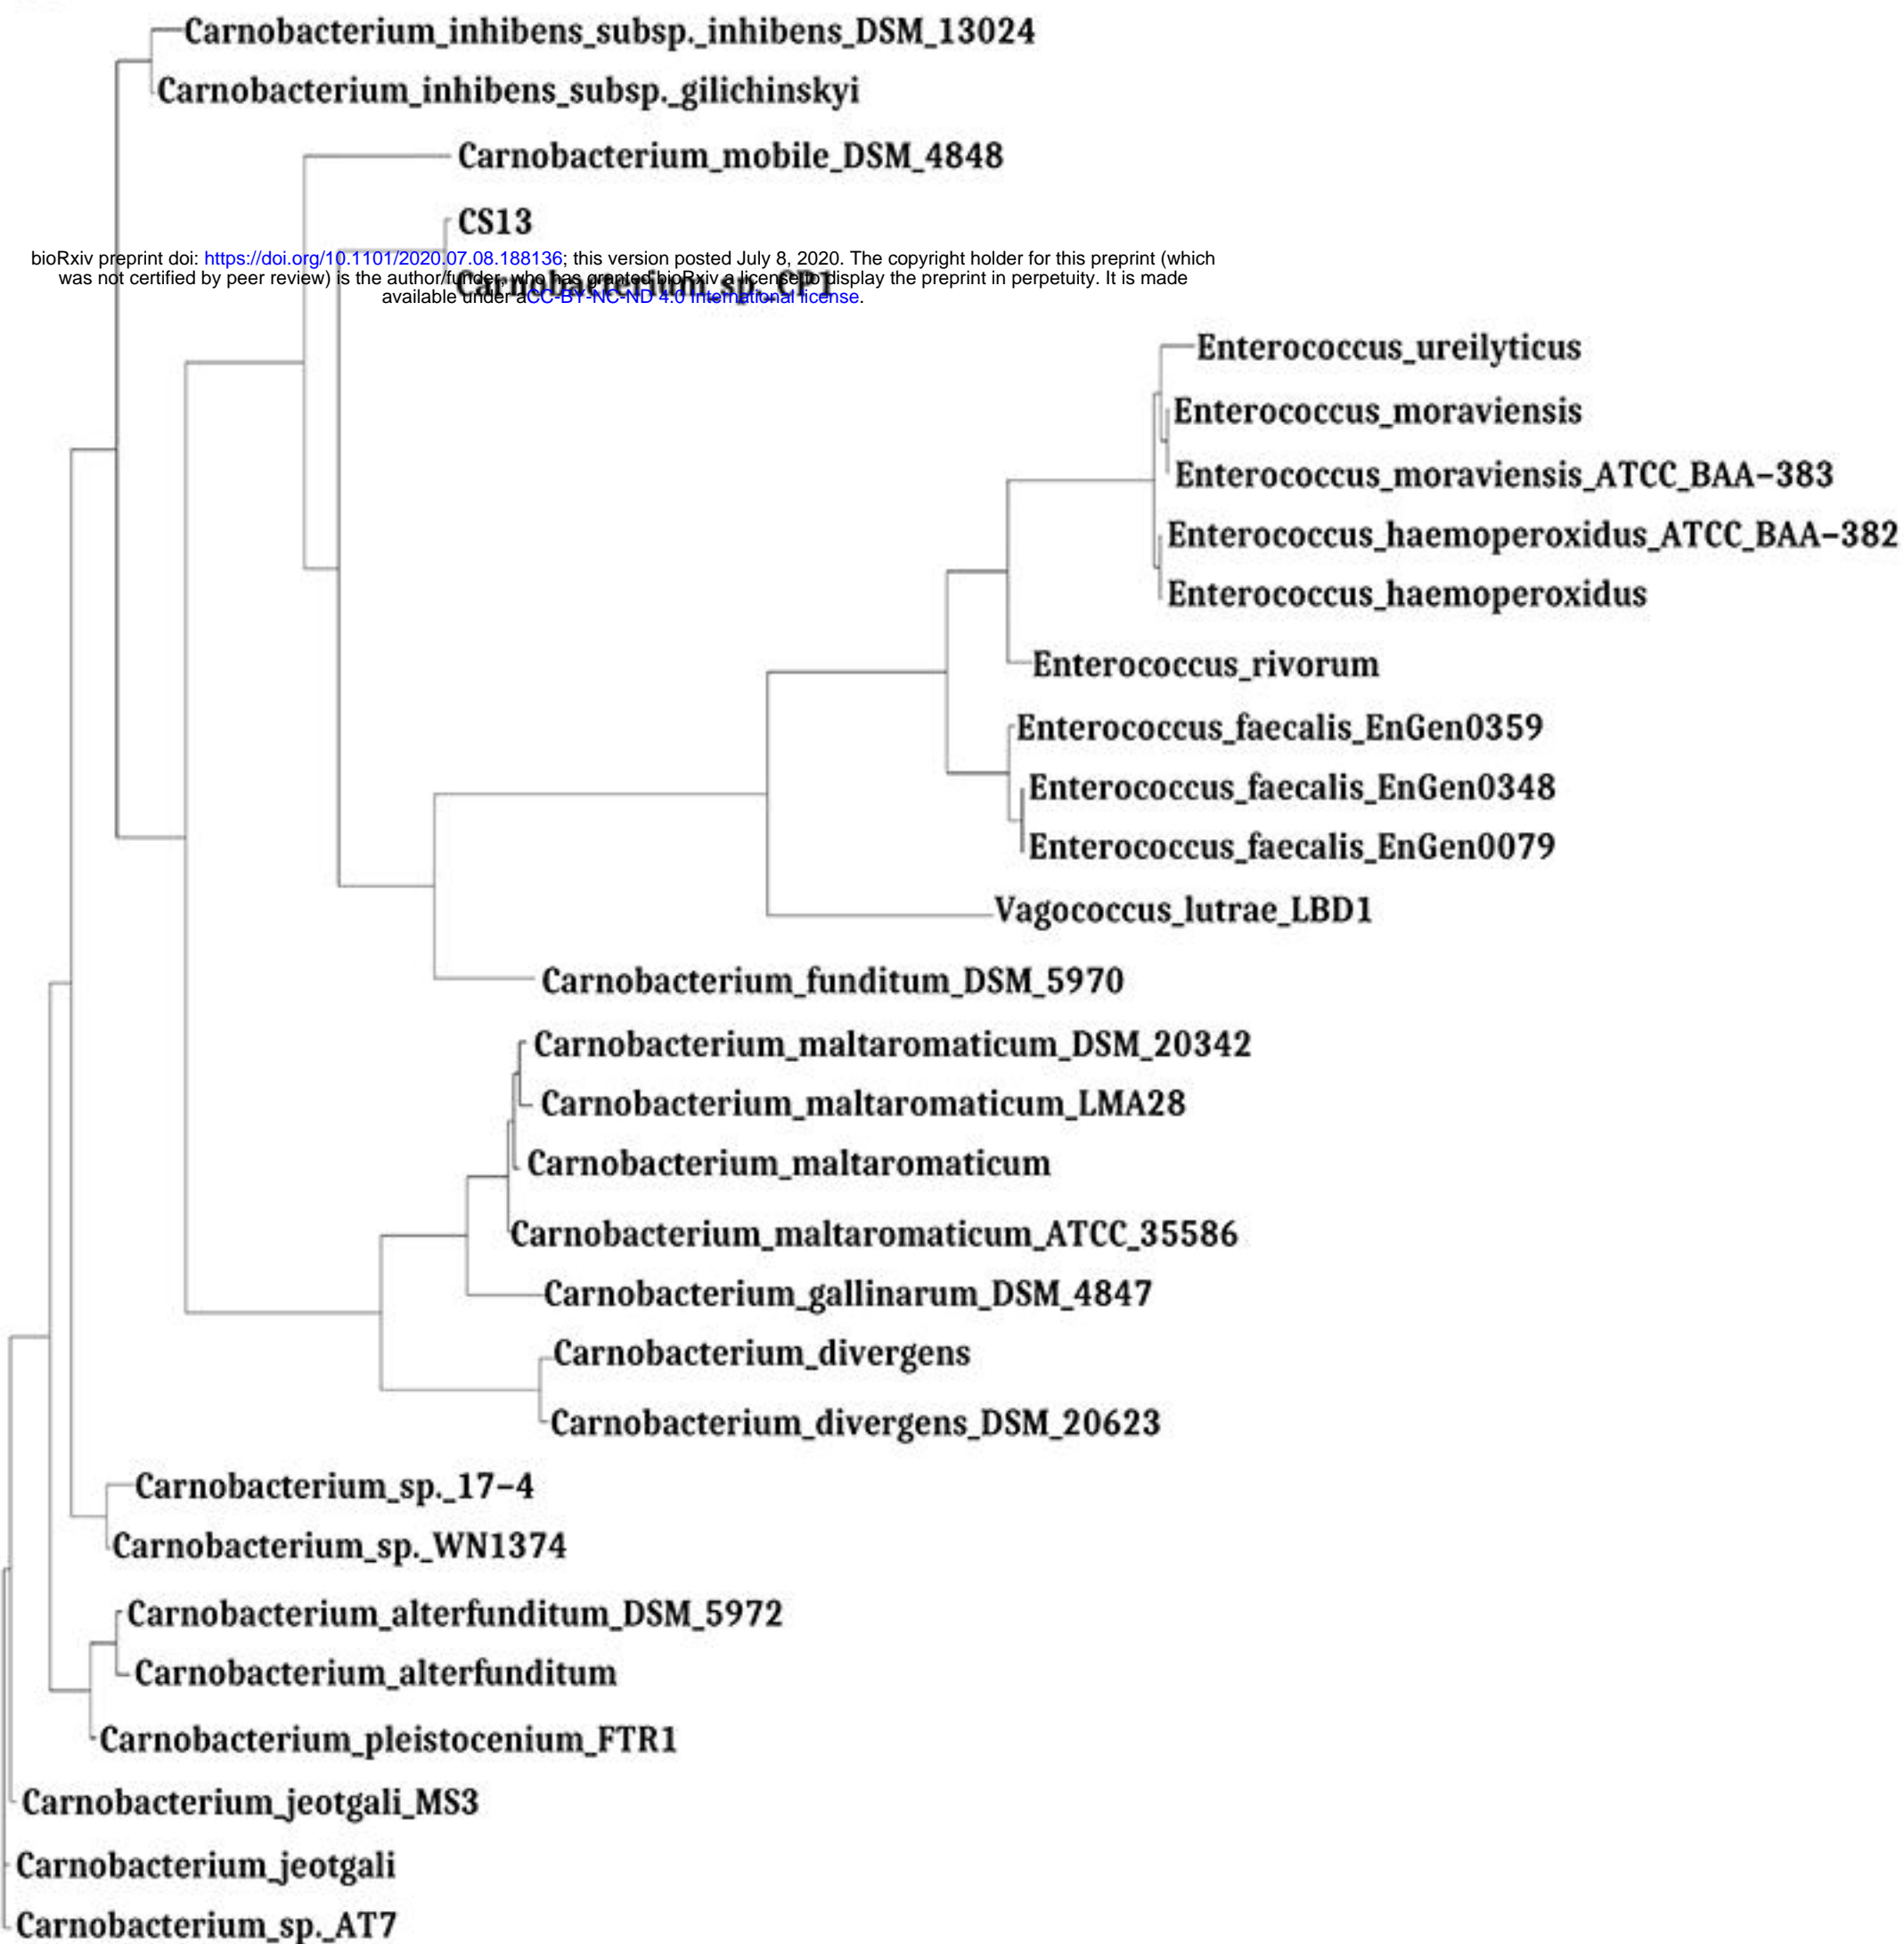**B**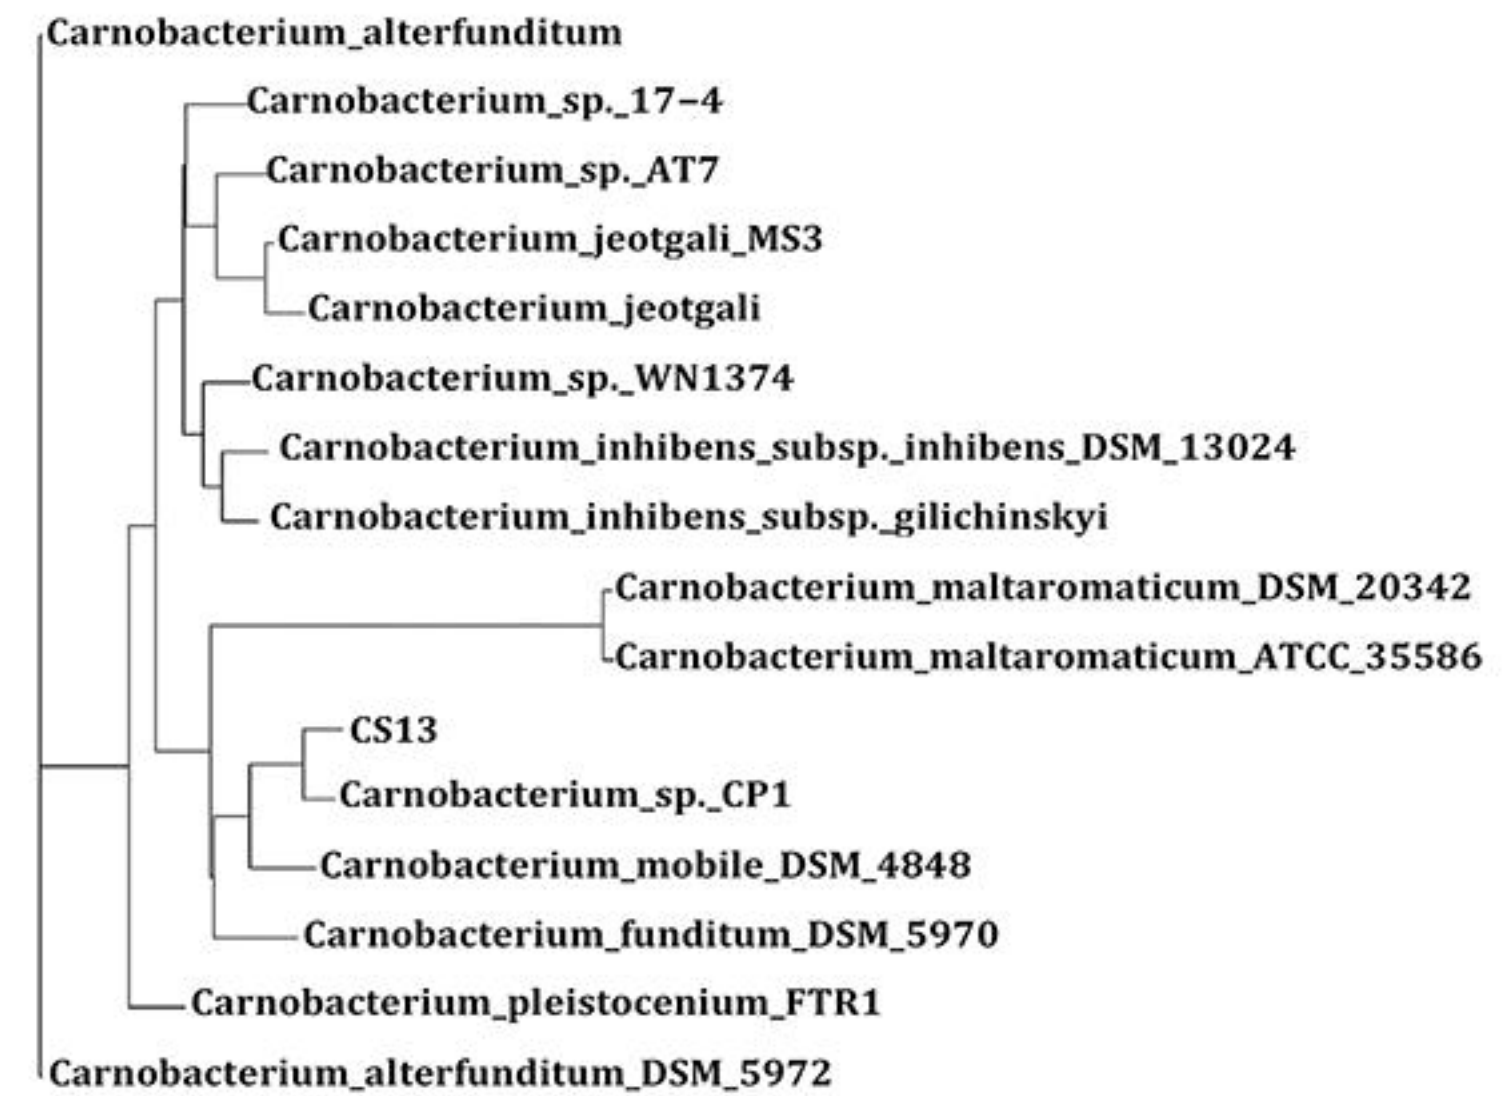**C****NR species distribution**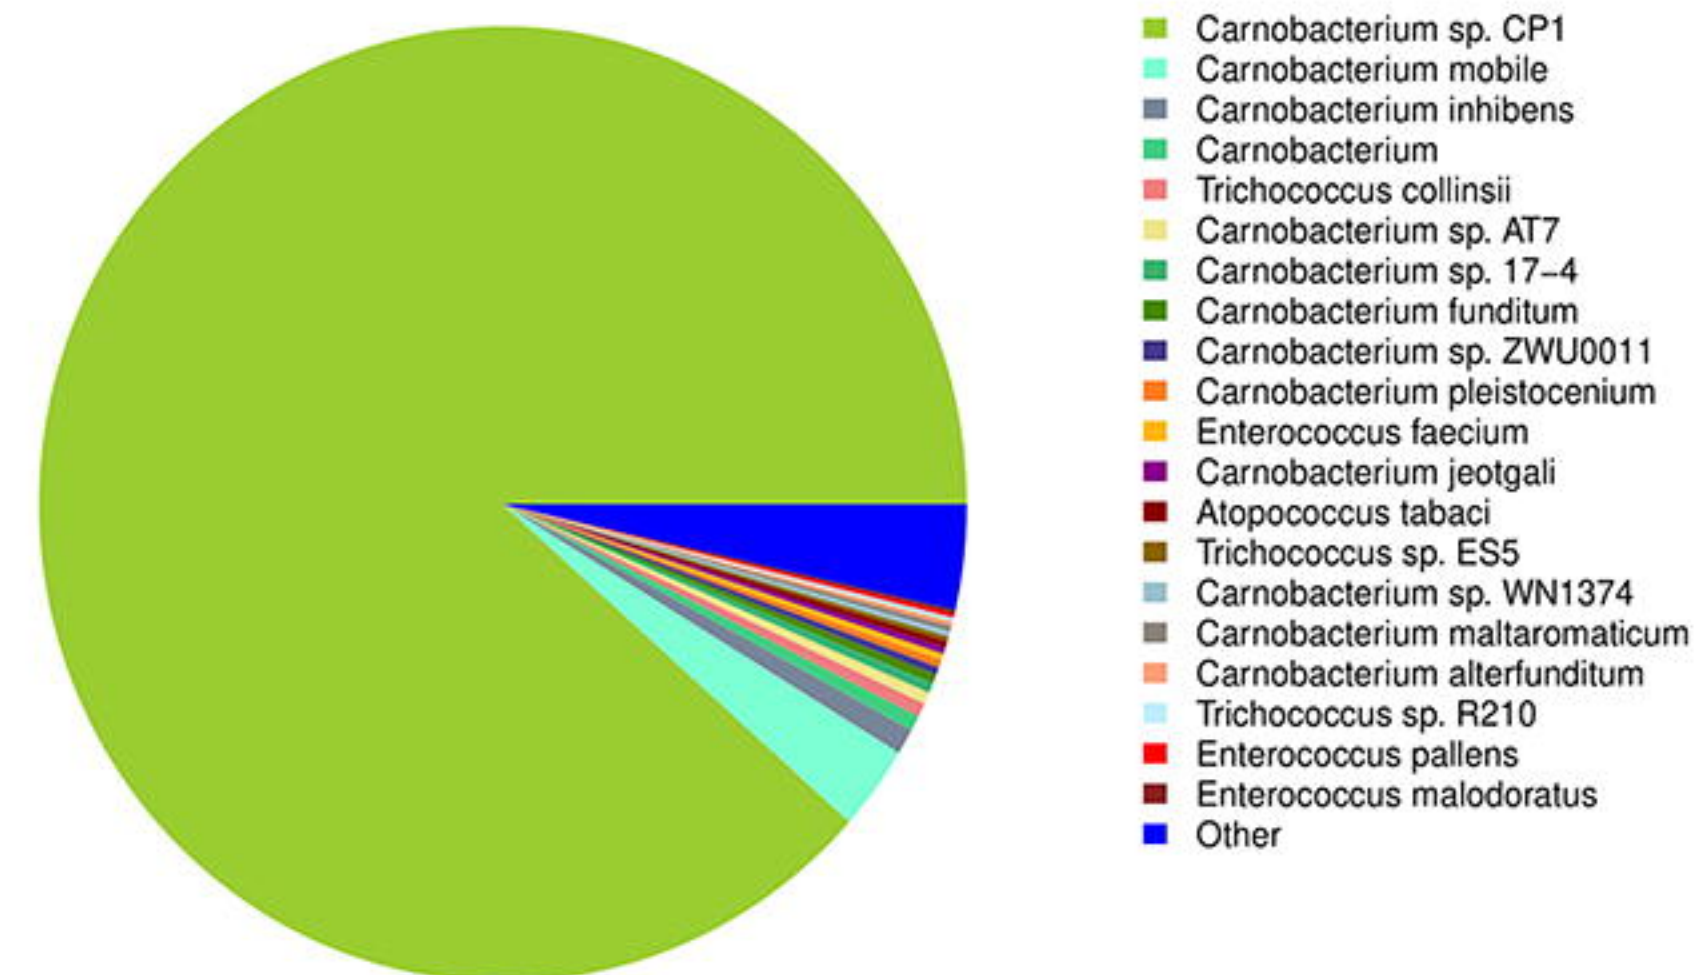



**A**

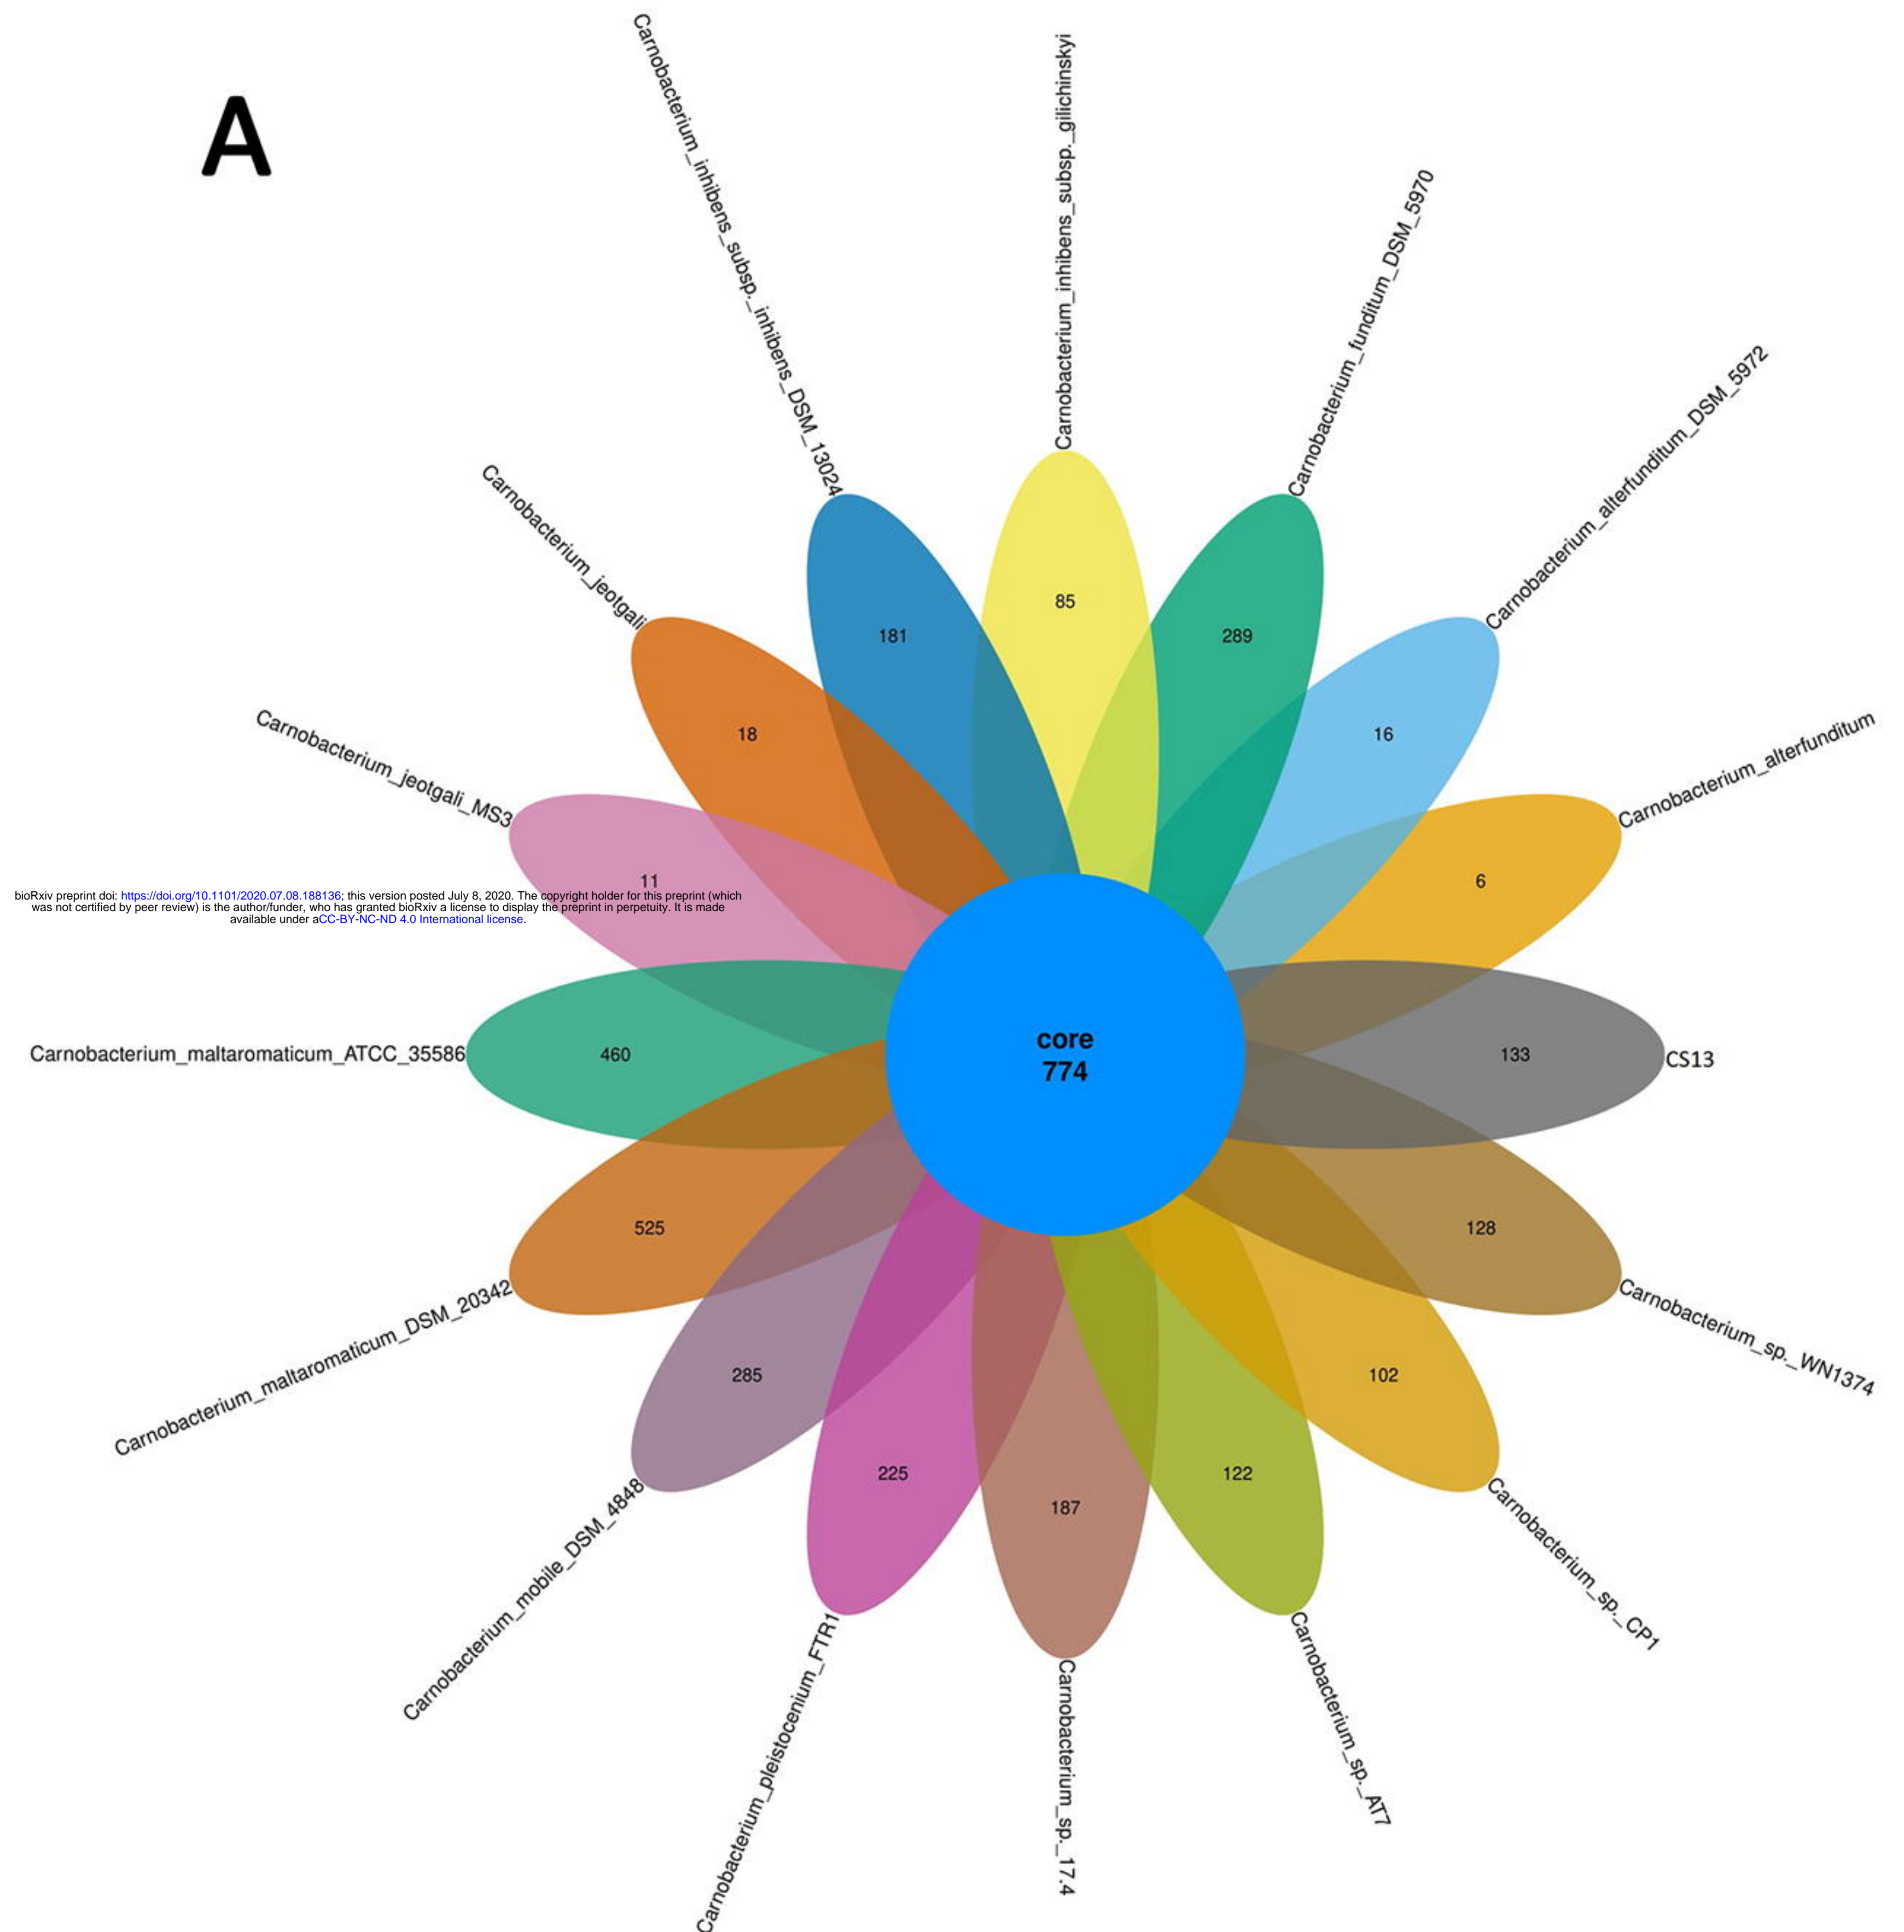

**B**

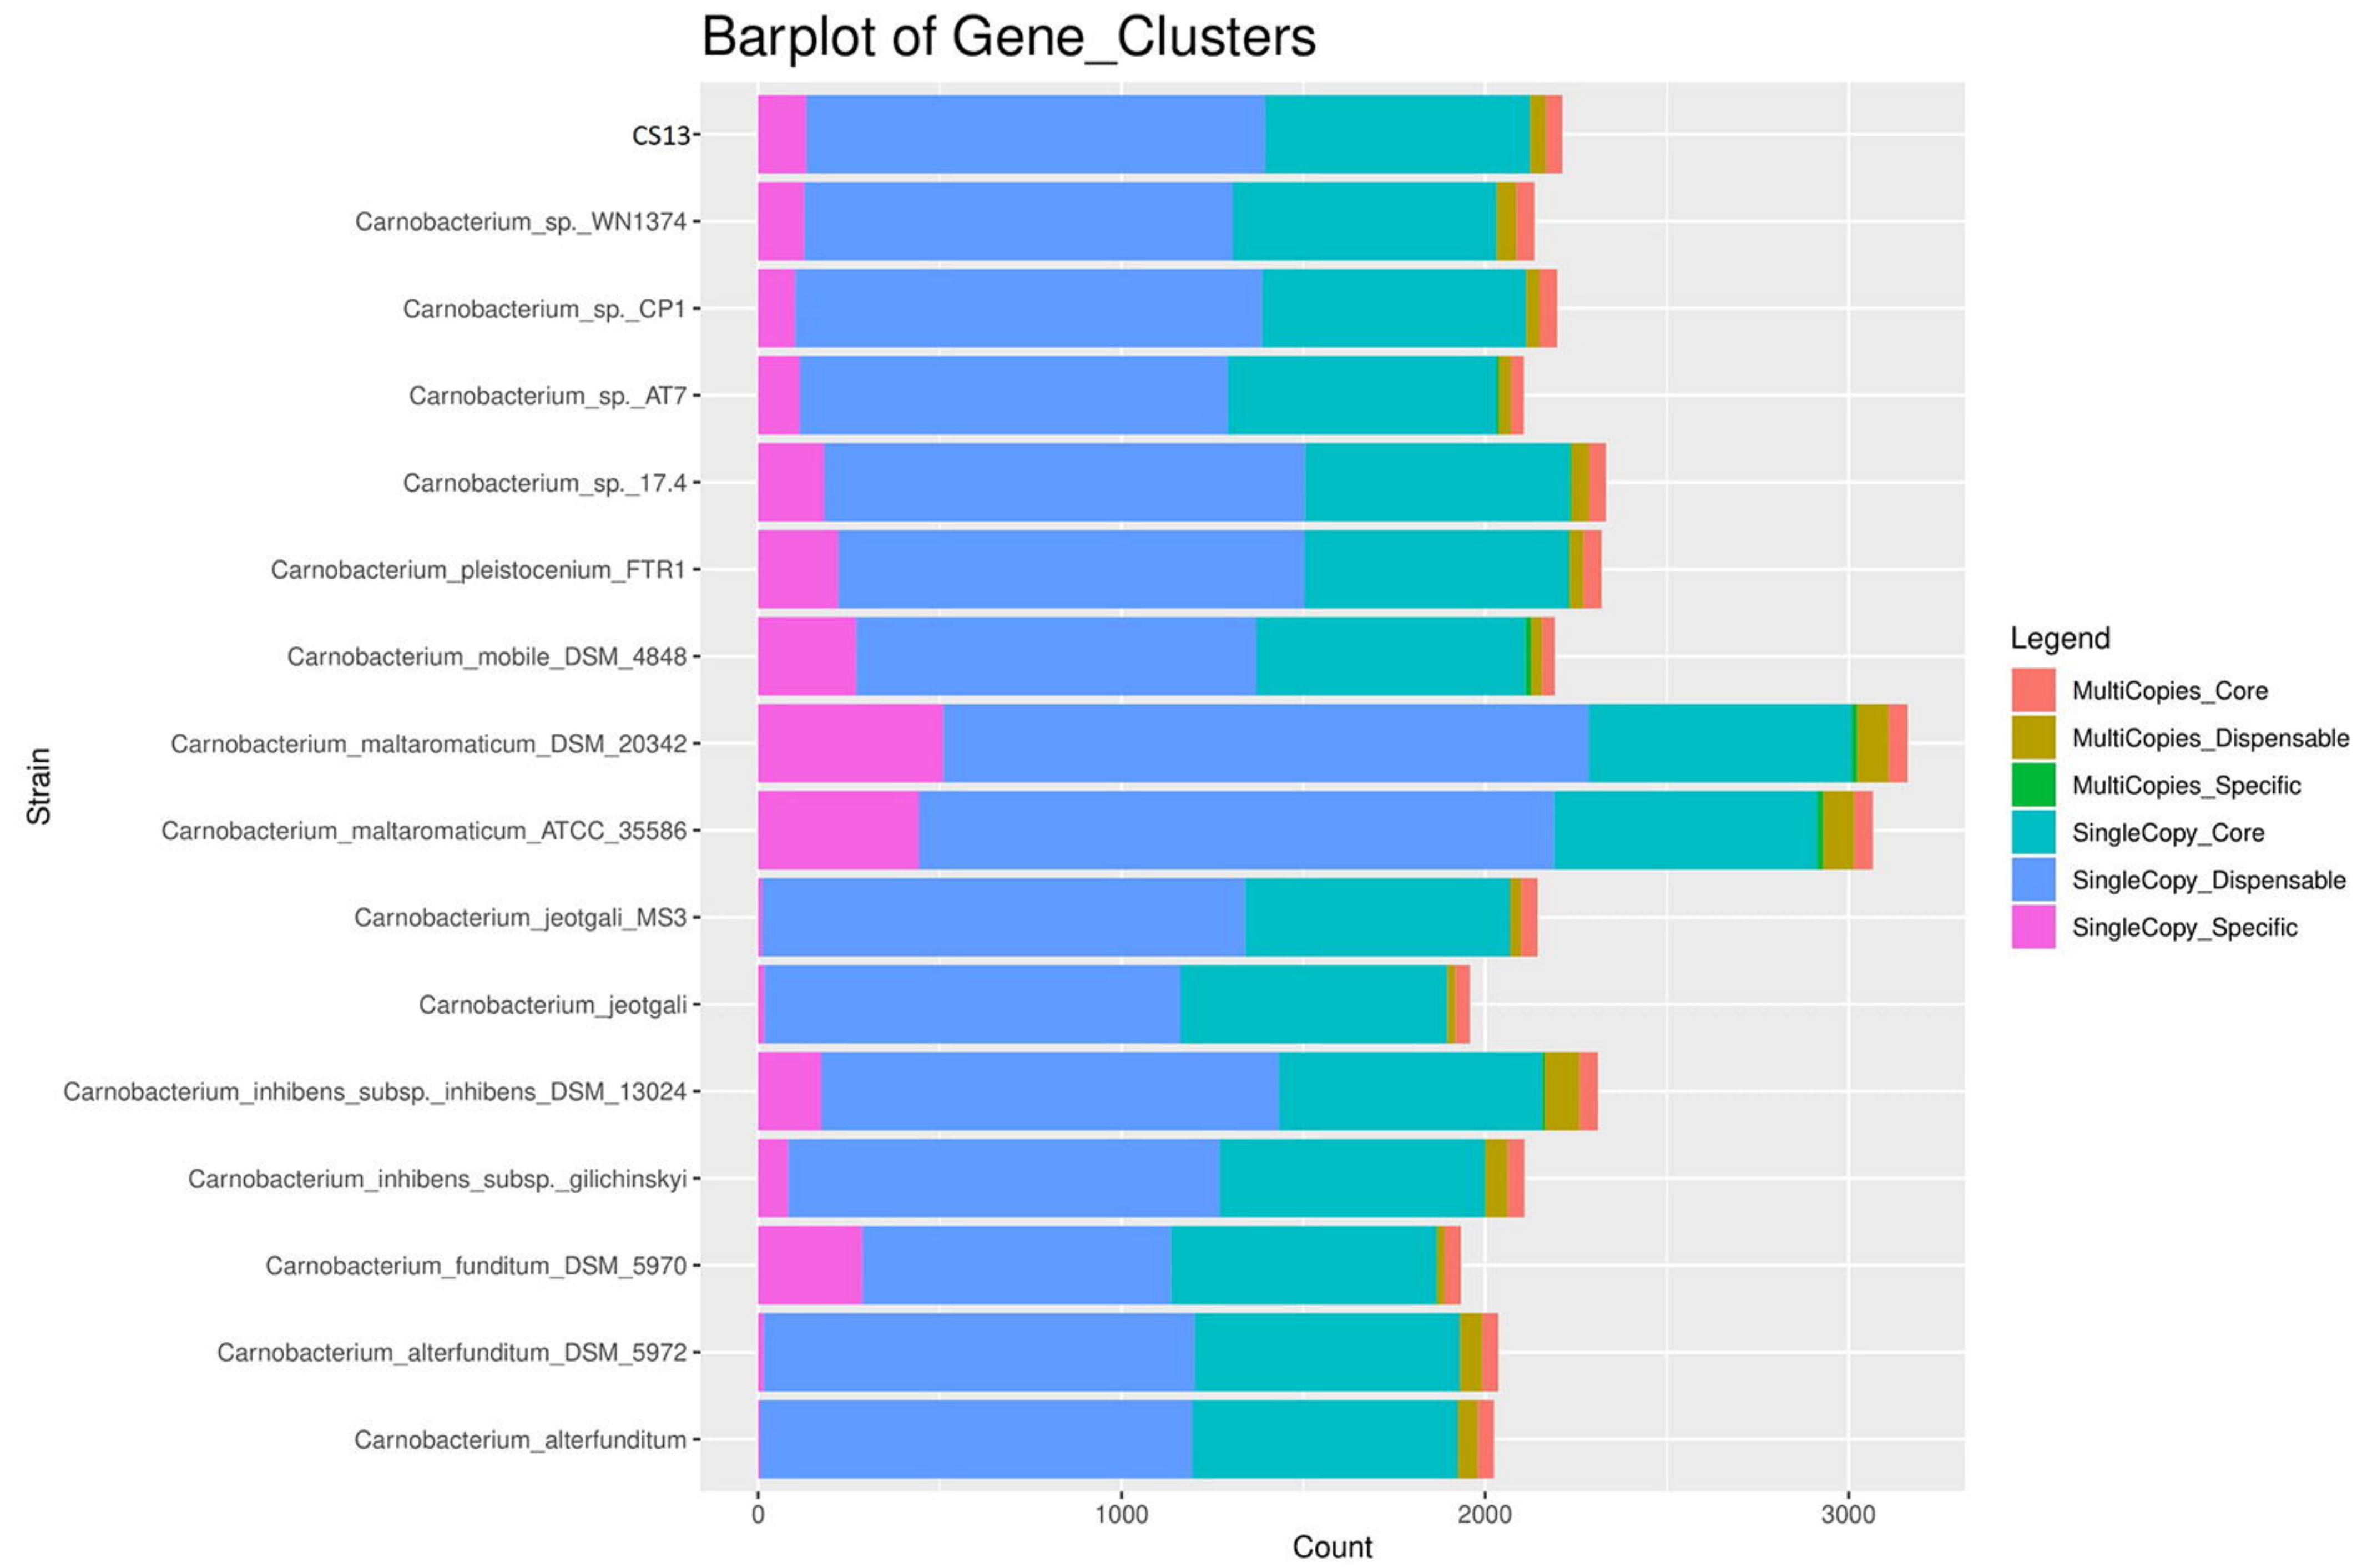

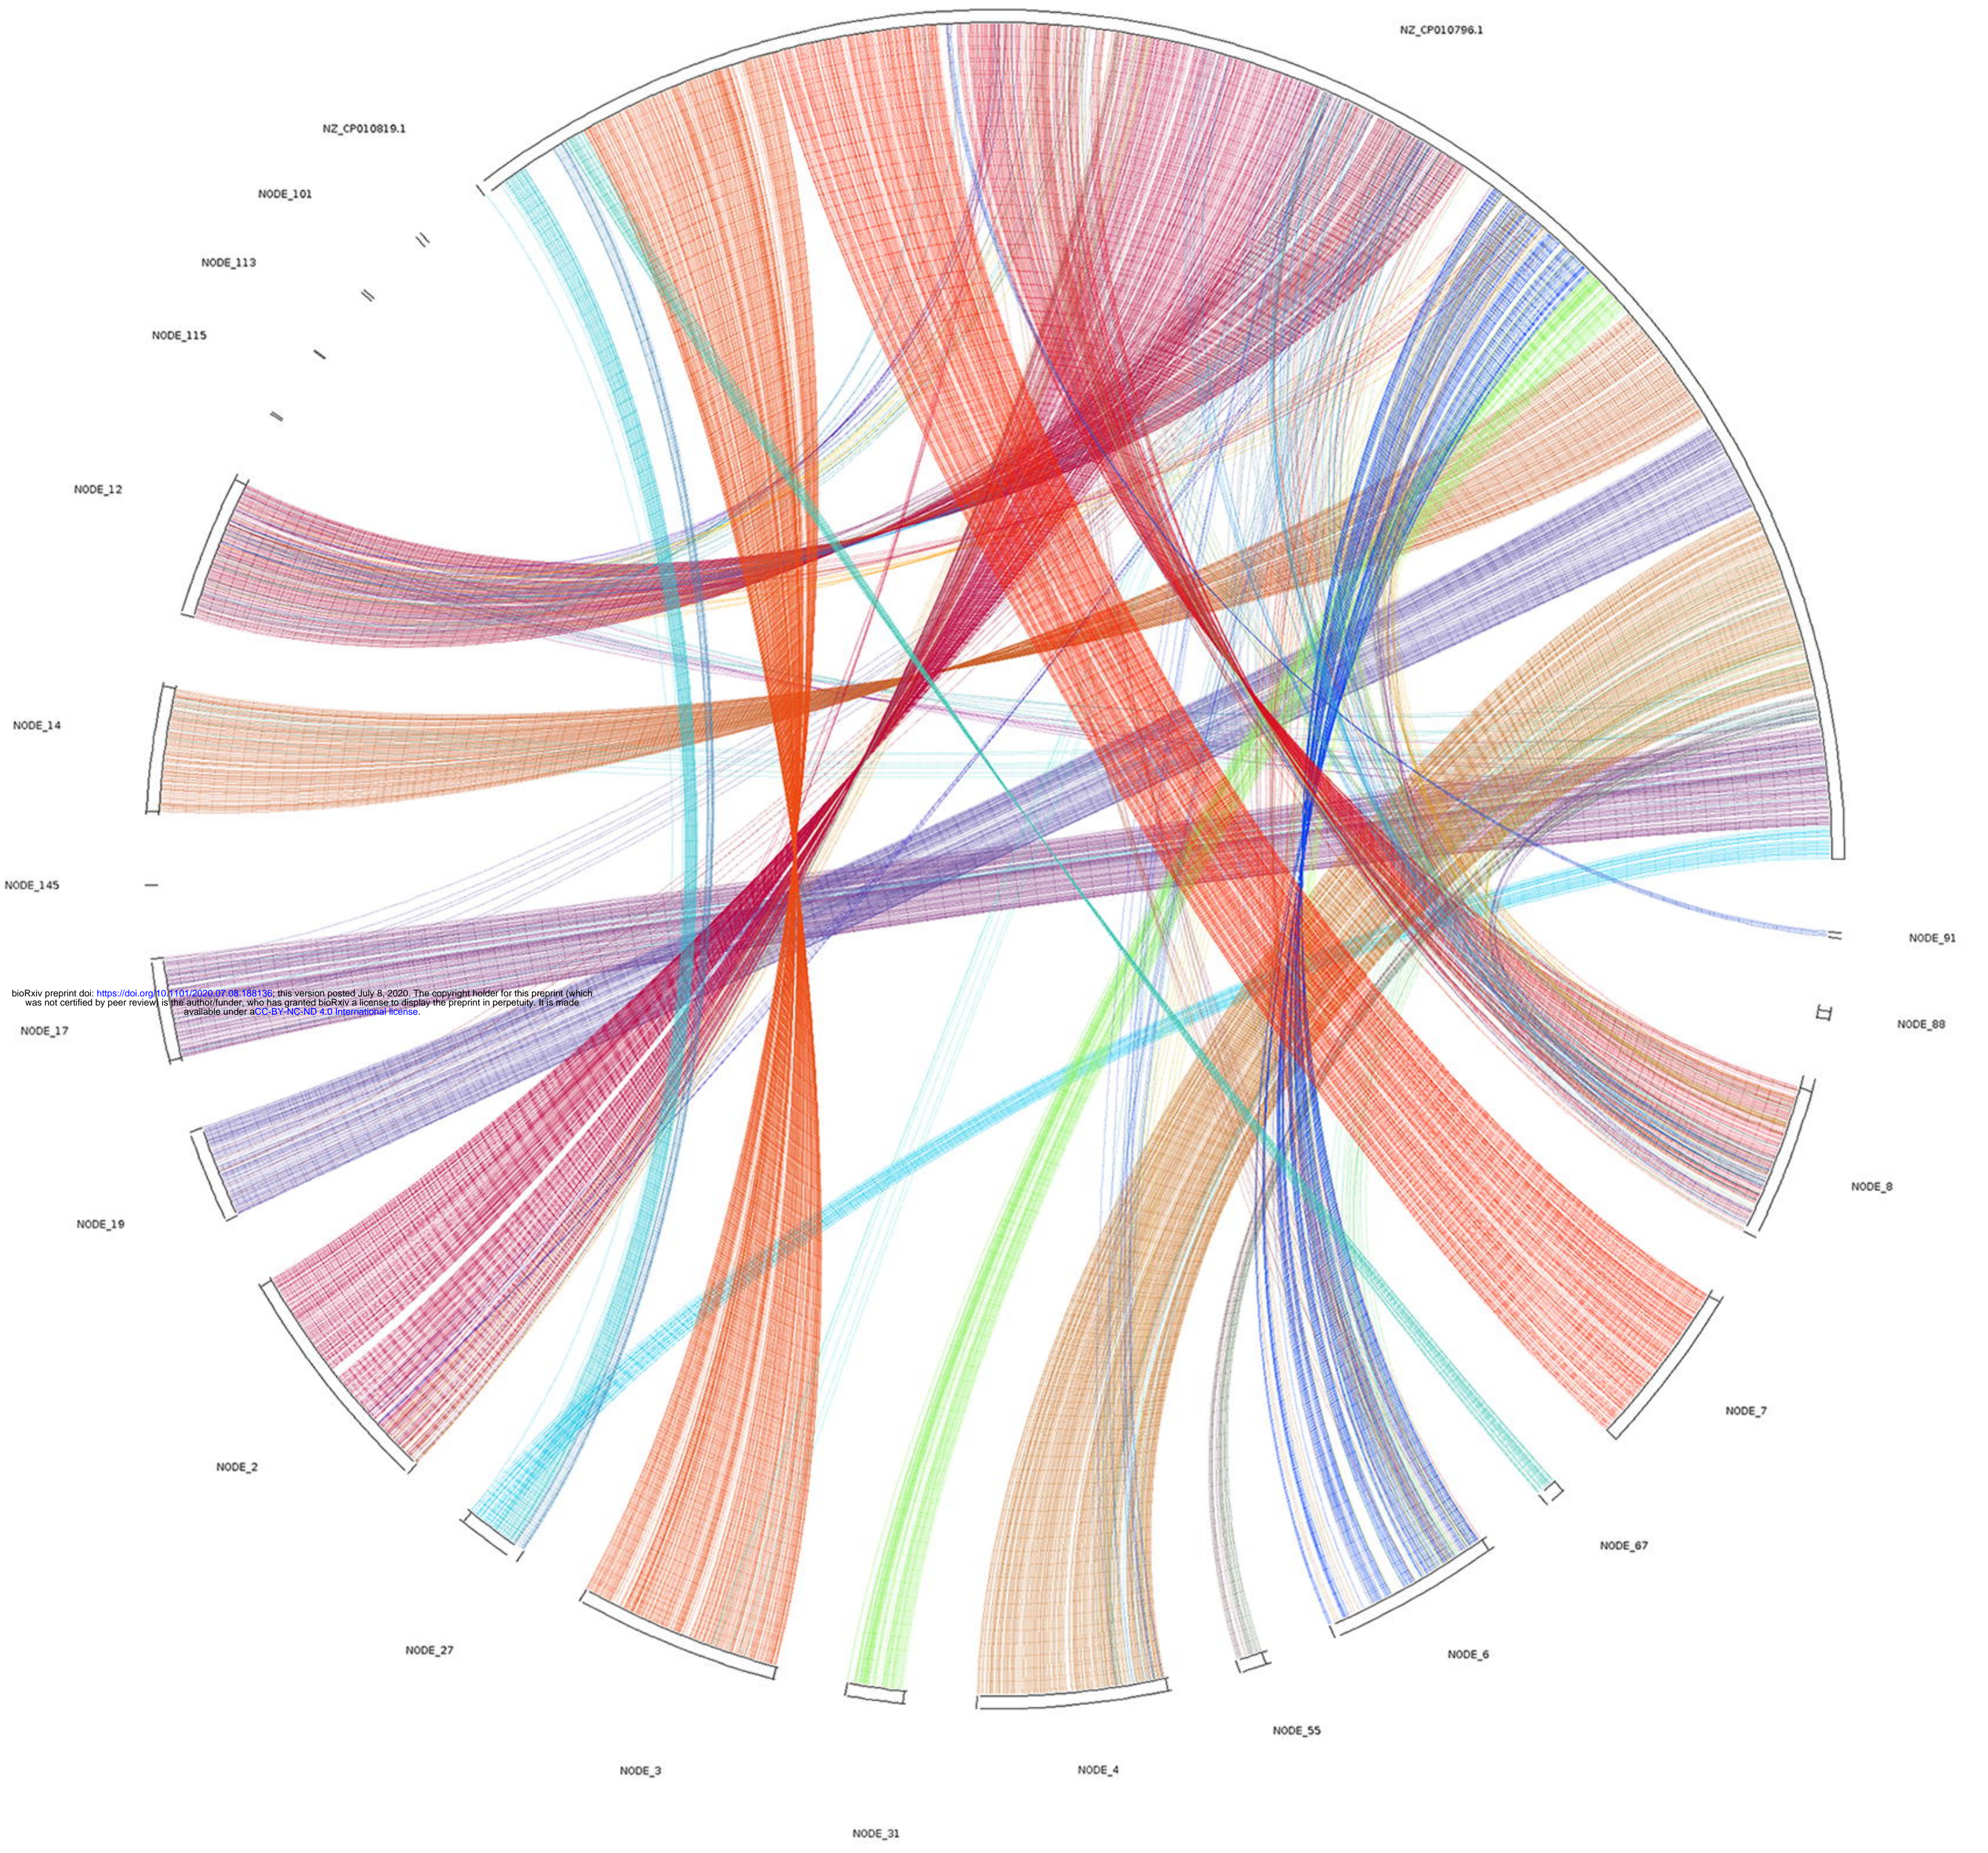

bioRxiv preprint doi: <https://doi.org/10.1101/2020.07.08.188136>; this version posted July 8, 2020. The copyright holder for this preprint (which was not certified by peer review) is the author/funder, who has granted bioRxiv a license to display the preprint in perpetuity. It is made available under aCC-BY-NC-ND 4.0 International license.
